# Supplementary material for: The first liquid-crystalline, expanded porphyrinsElectronic supplementary information (ESI) available: synthetic procedures, hydrazinophyrin characterisation, and crystal structure data. See http://www.rsc.org/suppdata/cc/b3/b307901p/
Source: Royal Society of Chemistry journal article supplement (doi:10.1039/b307901p), 2003-01-01
Supplement: b307901p.doc [file b307901p.doc]

# First liquid crystalline, expanded porphyrin

Jonathan L. Sessler**a*, Wyeth Callaway, *a* Stephen P. Dudek, *a* Richard W. Date, *b* Vincent Lynch *a* and Duncan W. Bruce**b*

a Department of Chemistry and Biochemistry, Institute for Cellular and Molecular Biology, The University of Texas at Austin, Austin, TX 78712-0165, USA. Fax: 1-512-471-7550; E-mail: sessler@mail.utexas.edu

*b School of Chemistry, University of Exeter, Stocker Road, Exeter EX4 4QD, UK. Fax:44 1392263434; E-mail: d.bruce@exeter.ac.uk*

# Supplemental Information

Appendix A: Experimental.

Appendix B: Crystallographic data and tables relating to the structure of **1a**.

## Appendix A

All solvents and chemicals were obtained commercially and used as received. Proton and 13C-NMR spectra were measured at 25 ºC on a Varian Unity Innova Spectrometer at 300 MHz. UV-vis spectra were recorded on a BECKMAN DU 640B spectrophotometer. High resolution CI mass spectra were obtained on a VG ZAB2-E mass spectrometer.

**3,4-Dimethoxypyrrole (2a)** was synthesized in accord with a standard literature procedure.1

The diformylpyrrole precursors for hydrazinophyrin are air and light sensitive. Therefore, the alkoxy pyrrole derivatives are stored as the more stable -free species. When needed for a condensation, the -free species is first diformylated as described below and condensed then reacted with hydrazine immediately after work-up.

Formylation of 3,4-alkoxypyrroles: General procedure.

**2,5-Diformyl-3,4-dimethoxypyrrole (3a)** 3,4-dimethoxypyrrole (**2**) (0.632 g, 4.97 mmol) was added to a 3-neck RBF, equipped with a dropping funnel, evacuated, and protected from light. The flask was placed under argon and cooled in an ice bath. Trifluoroacetic acid (20 ml) was then added, followed by the dropwise addition of triethyl orthoformate (20 ml) over 15 minutes. After the addition was complete, the reaction was removed from the ice bath and stirred for one hour. The reaction mixture was then poured slowly and carefully into 150 ml sat. aqueous NaHCO3. Dichloromethane was added (200 ml) and the resulting organic layer was washed with sat. NaHCO3 (3 x 50 ml). The organic layer was dried over Na2SO4, filtered through a plug of silica gel which was then washed with methanol (50 ml). The filtrate and washings were combined and the solvents were then removed under reduced pressure. The resulting oil was purified by chromatography over alumina using argon pressure with EtOAc as the eluant. This gave (**3**) as a white solid (0.557 g, 61.2%). 1H NMR (300 MHZ, CDCl3):  4.06 (s, 6H, C*H*3), 9.17 (broad, 1H, NH-pyrrole), 9.85 (s, 2H, C*H*O); 13C NMR (75.5 MHZ, CDCl3):  62.5, 123.3, 143.8, 178.9; MS (CI+): 184.12.

(**1a**) The diformyl pyrrole (**3a**) (0.260g, 1.45 mmol) was added to a 500 ml RBF, followed by a mixture of toluene/methanol (1:1, 450 ml). Stirring was then commenced and hydrazine (0.056 g, 1.74 mmol) was added to the solution followed by conc. HCl (0.336 ml). Within 15 minutes the solution became dark red and a precipitate formed. The reaction mixture was heated at reflux for 2 hours. The mix was neutralized via the addition of triethylamine (1 ml). The solvents were removed under reduced pressure. Chromatography over silica gel was performed using a gradient of 0-2% MeOH/CHCl3 as the eluent. The recovered material was recrystallized from acetone, filtered and washed with cold ether to yield (**1a**) as a black solid (0.161g, 58.1%). 1H NMR (300 MHZ, CDCl3):  3.846 (s, 3H, C*H*3), 3.851 (s, 3H, C*H*3), 3.858 (s, 3H, C*H*3), 3.88 (s, 3H, C*H*3), 7.33 (s, 2H, C*H*=N-N), 8.02 (s, 2H, C*H*=N-N ), 8.11 (s, 2H, C*H*=N-N), 9.79 (s, 2H, C*H*=N-N), 12.03 (s, 2H, NH-pyrrole), 13.15 (s, 2H, NH-pyrrole); 13C NMR (75.5 MHZ, CDCl3):  59.81, 60.00, 60.61, 60.67, 116.00, 118.06, 119.42, 119.70, 136.67, 140.24, 140.40, 140.88, 141.65, 146.66, 148.48, 152.95; HRMS (CI+) *m*/*e* calc’d for C32H36N12O8: 717.2857 found: 717.2860; UV-Vis (DCM), max 419 ( = 2.8 x 105 L-1 M-1).

(**1b**) 1H NMR (300 MHZ, CDCl3):  0.87 (m, OCH2CH2(CH2)3C*H*3), 1.2-1.5 (m, OCH2CH2(C*H*2)3CH3), 1.66 (m, OCH2C*H*2(CH2)3CH3), 3.95 (m, OC*H*2CH2(CH2)3CH3), 7.23 (s, 2H, C*H*=N-N), 7.90 (s, 2H, C*H*=N-N), 8.10 (s, 2H, C*H*=N-N), 9.75 (s, 2H, C*H*=N-N), 12.15 (s, 2H, NH-pyrrole), 13.37 (s, 2H, NH-pyrrole).

(**1c)** 1H NMR (300 MHZ, CDCl3):  0.90 (m, OCH2CH2(CH2)7C*H*3), 1.2-1.5 (m, OCH2CH2(C*H*2)7CH3), 1.70 (m, OCH2C*H*2(CH2)7CH3), 3.98 (m, OC*H*2CH2(CH2)7CH3), 7.31 (s, 2H, C*H*=N-N), 8.0 (s, 2H, C*H*=N-N), 8.18 (s, 2H, C*H*=N-N), 9.8 (s, 2H, C*H*=N-N), 12.14 (s, 2H, NH-pyrrole), 13.41 (s, 2H, NH-pyrrole).

(**1d**) 1H NMR (300 MHZ, CDCl3):  0.86 (m, OCH2CH2(CH2)11C*H*3), 1.0-1.6 (m, OCH2CH2(C*H*2)11CH3), 1.64 (m, OCH2C*H*2(CH2)11CH3), 3.95 (m, OC*H*2CH2(CH2)11CH3),7.25 (s, 2H, C*H*=N-N), 7.93 (s, 2H, C*H*=N-N), 8.11 (s, 2H, C*H*=N-N), 9.73 (s, 2H, C*H*=N-N), 12.12 (s, 2H, NH-pyrrole), 13.23 (s, 2H, NH-pyrrole).

Dimethyl 1-benzyl-3,4-dihydroxypyrrole-2,5-dicarboxylate (**4**) was synthesized in accord with a standard literature procedure.1

Alkylation of dihydroxypyrrole (**4  5b-5d**): General procedure.

**Dimethyl-1-benzyl-3,4-didecyloxypyrrole-2,5-dicarboxylate** (**5c**) The dihydroxy pyrrole (**4**) (11.0 g, 36 mmol) was dissolved in acetonitrile (250 ml). Solid K2CO3 (24.8 g, 180 mmol) was then added, followed by 1-bromodecane (15.94 g, 72 mmol). The resulting mixture was heated at reflux for 2 days and filtered to remove unreacted K2CO3. The solvent was removed under reduced pressure and the residue was subjected to kugelrohr distillation to remove left over bromodecane. Column chromotography over silica gel using 4% EtOAc/hexanes as the eluent yielded product (**5c**) as a brown oil (12.63 g, 60%). 1H NMR (300 MHZ, CDCl3):  0.86 (t, 6H, OCH2CH2(CH2)7C*H*3), 1.2-1.4 (m, 28H, OCH2CH2(C*H*2)7CH3), 1.71 (p, 4H, OCH2C*H*2(CH2)7CH3), 3.78 (s, 6H, CO2C*H*3), 4.01 (t, 4H, OC*H*2CH2(CH2)7CH3), 5.97 (s, 2H, C*H*2C6H5), 6.8-7.2 (m, 5H, CH2C6*H*5); 13C NMR (75.5 MHZ, CDCl3):  14.06, 22.65, 26.00, 29.31, 29.45, 29.58, 29.64, 30.03, 31.87, 48.73, 51.53, 75.10, 116.49, 125.83, 126.77, 128.31, 139.04, 142.70, 160.78; MS (CI+): 586.42.

Debenzylation of dimethyl 1-benzyl-3,4-dialkoxypyrrole-2,5-dicarboxylates **5b-5d** ** 6b-6d**: General procedure.

**Dimethyl 3,4-didecyloxypyrrole-2,5-dicarboxylate** (**6c**) The N-benzyl pyrrole (12.63 g, 21.56 mmol) (**5c**) was dissolved in trifluoroacetic acid (100 ml), and then anisole (3.03 g, 28.02 mmol) and H2SO4 (0.81 ml) were added. The resulting solution was heated at reflux for 30 minutes. The solvent was then removed under reduced pressure and aqueous sat. NaHCO3 was added to neutralize the residue. The ensuing mixture was extracted with dichloromethane (3 x 150 ml) and dried over Na2SO4. The solvents were removed under reduced pressure and purification was effected by column chromatography over silica gel using 1-2% EtOAc/hexanes to elute first remaining starting material, then 10% EtOAc/hexanes to afford the product as a brown oil (8.24 g, 77%). 1H NMR (300 MHZ, CDCl3):  0.86 (t, 6H, OCH2CH2(CH2)7C*H*3), 1.25-1.44 (m, 28H, OCH2CH2(C*H*2)7CH3), 1.72 (p, 4H, OCH2C*H*2(CH2)7CH3), 3.87 (s, 6H, CO2C*H*3), 4.06 (t, 4H, OC*H*2CH2(CH2)7CH3), 8.83 (s, 1H, NH-pyrrole); 13C NMR (75.5 MHZ, CDCl3):  14.34, 22.92, 26.138, 29.59, 29.68, 29.84, 29.90, 30.19, 32.15, 52.09, 75.31, 113.56, 142.03, 160.47.

Saponification and decraboxylation of dimethyl-3,4-dialkoxypyrrole-2,5-dicarboxylate **6b-d  2b-d**: General procedure.

**3,4-Didecyloxypyrrole** (**2c**) The pyrrole dicarboxylate (**6c**) (8.24 g, 16.62 mmol) was added to ethylene glycol (150 ml) and degassed for 2 hours under reduced pressure (0.5 mm Hg). KOH was added (3.73 g, 66.47 mmol) and the mixture degassed an additional hour. The mixture was placed under argon and added to a preheated oil bath at 180oC and heated for 3 hours. The reaction mixture was cooled and water was added (250 ml); the mixture was then extracted with EtOAc (3 x 150 ml). The extracts were dried over Na2SO4, and the solvent was then removed under reduced pressure. Column chromatography over silica gel using a gradient of 10-20% EtOAc/hexanes as the eluent gave the product as a flaky lustrous tan solid (3.6 g, 57%).1H NMR (300 MHZ, CDCl3):  0.87 (t, 6H, OCH2CH2(CH2)7C*H*3), 1.2-1.45 (m, 28H, OCH2CH2(C*H*2)7CH3), 1.74 (p, 4H, OCH2C*H*2(CH2)7CH3), 3.84 (t, 4H, OC*H*2CH2(CH2)7CH3), 6.18 (d, 2H, -H-pyrrole), 7.06 (s, 1H, NH-pyrrole); 13C NMR (75.5 MHZ, CDCl3):  13.96, 22.54, 25.89, 29.21, 29.33, 29.46, 29.49, 31.77, 71.50, 100.60, 137.27; MS (CI+): 380.34.

**References**

1. A. Merz, R. Schropp, E. Dotterl, *Synthesis*, 1995, 795-800.

## Appendix B

**Crystallographic Data for “Hydrazinophyrin” (1a)**

# X-ray Experimental

Table 1. Crystallographic Data for **1a**.

Table 2. Fractional coordinates and equivalent isotropic thermal parameters (Å2) for the non-hydrogen atoms of **1a**.

Table 3. Bond Lengths (Å) and Angles (o) for the non-hydrogen atoms of **1a**.

Table 4. Anisotropic thermal parameters for the non-hydrogen atoms of **1a**.

Table 5. Fractional coordinates and isotropic thermal parameters (Å2) for the hydrogen atoms of **1a**.

Table 6. Torsion Angles (o) for the non-hydrogen atoms of **1a**.

Figure 1. View of **1a** showing the atom labeling scheme. Displacement ellipsoids are scaled to the 50% probability level. Some of the hydrogen atoms have been removed for clarity. The macrocycle lies around a crystallographic inversion center at ½, ½, ½. Atoms with labels appended by ‘ are related by 1-x, 1-y, 1-z. Dashed lines are indicative of H-bonding interactions with geometry: N11-H11…O1a’, N…O 2.763(3)Å, H…O 1.86(3)Å, N-H…O 171(3)°; O1a-H1a…N7, O…N 2.698(3)Å, H…N 1.86(3)Å, O-H…N 166(3)°.

Figure 2. Unit cell packing diagram for **1a**. The view is approximately down the **a** axis.

X-ray Experimental for C32H36N12O8 - 2 CH3OH: Crystals grew as very long, thin needles by layering THF and MeOH over water in a small tube. The data crystal was a cut from a larger crystal and had approximate dimensions; 0.41x0.11x0.09 mm. The data were collected on a Nonius Kappa CCD diffractometer using a graphite monochromator with MoK radiation ( = 0.71073Å). A total of 433 frames of data were collected using -scans with a scan range of 1.1 and a counting time of 136 seconds per frame. The data were collected at 153 K using an Oxford Cryostream low temperature device. Details of crystal data, data collection and structure refinement are listed in Table 1. Data reduction were performed using DENZO-SMN.1 The structure was solved by direct methods using SIR922 and refined by full-matrix least-squares on F2 with anisotropic displacement parameters for the non-H atoms using SHELXL-97.3 The hydrogen atoms on carbon were calculated in ideal positions with isotropic displacement parameters set to 1.2xUeq of the attached atom (1.5xUeq for methyl hydrogen atoms). The hydrogen atoms bound to nitrogen and oxygen were observed in a F map and refined with isotropic displacement parameters. The function, w(|Fo|2 - |Fc|2)2, was minimized, where w = 1/[((Fo))2 + (0.0407*P)2 + (1.0354*P)] and P = (|Fo|2 + 2|Fc|2)/3. Rw(F2) refined to 0**.**153, with R(F) equal to 0.0654 and a goodness of fit, S, = 1.333. Definitions used for calculating R(F),Rw(F2) and the goodness of fit, S, are given below.4 The data were corrected for secondary extinction effects. The correction takes the form: Fcorr = kFc/[1 + (1.0(2)x10-5)* Fc2 3/(sin2)]0.25 where k is the overall scale factor. Neutral atom scattering factors and values used to calculate the linear absorption coefficient are from the International Tables for X-ray Crystallography (1992).5 All figures were generated using SHELXTL/PC.6 Tables of positional and thermal parameters, bond lengths and angles, torsion angles, figures and lists of observed and calculated structure factors are located in tables 1 through 7.

**References**

1. DENZO-SMN. (1997). Z. Otwinowski and W. Minor, Methods in Enzymology, **276**: Macromolecular Crystallography, part A, 307 – 326, C. W. Carter, Jr. and R. M. Sweets, Editors, Academic Press.

2) SIR92. (1993). A program for crystal structure solution. Altomare, A., Cascarano, G., Giacovazzo, C. & Guagliardi, A. J. Appl. Cryst. 26, 343-350.

3) Sheldrick, G. M. (1994). SHELXL97. Program for the Refinement of Crystal Structures. University of Gottingen, Germany.

4) Rw(F2) = {w(|Fo|2 - |Fc|2)2/w(|Fo|)4}1/2 where w is the weight given each reflection.

R(F) = (|Fo| - |Fc|)/|Fo|} for reflections with Fo > 4((Fo)).

S = [w(|Fo|2 - |Fc|2)2/(n - p)]1/2, where n is the number of reflections and p is the number of refined parameters.

1. International Tables for X-ray Crystallography (1992). Vol. C, Tables 4.2.6.8 and 6.1.1.4, A. J. C. Wilson, editor, Boston: Kluwer Academic Press.

6) Sheldrick, G. M. (1994). SHELXTL/PC (Version 5.03). Siemens Analytical X-ray Instruments, Inc., Madison, Wisconsin, USA.

Table 1. Crystal data and structure refinement for **1a**.

Empirical formula C17 H22 N6 O5

Formula weight 390.41

Temperature 293(2) K

Wavelength 0.71073 Å

Crystal system Monoclinic

Space group P21/n

Unit cell dimensions a = 7.4409(1) Å = 90°.

b = 13.4669(2) Å = 90.1340(8)°.

c = 19.1745(4) Å  = 90°.

Volume 1921.39(6) Å3

Z 4

Density (calculated) 1.350 Mg/m3

Absorption coefficient 0.102 mm-1

F(000) 824

Crystal size 0.41 x 0.11 x 0.09 mm

Theta range for data collection 2.93 to 27.47°.

Index ranges -9<=h<=9, -17<=k<=17, -24<=l<=24

Reflections collected 8262

Independent reflections 4363 [R(int) = 0.0264]

Completeness to theta = 27.47° 99.3 %

Absorption correction None

Refinement method Full-matrix least-squares on F2

Data / restraints / parameters 4363 / 0 / 266

Goodness-of-fit on F2 1.333

Final R indices [I>2sigma(I)] R1 = 0.0654, wR2 = 0.1412

R indices (all data) R1 = 0.1008, wR2 = 0.1528

Extinction coefficient 1.01(16)x10-5

Largest diff. peak and hole 0.64 and -0.46 e.Å-3

Table 2. Atomic coordinates ( x 104) and equivalent isotropic displacement parameters (Å2x 103)

for **1a**. U(eq) is defined as one third of the trace of the orthogonalized Uij tensor.

________________________________________________________________________________

x y z U(eq)

________________________________________________________________________________

N1 2719(3) 6218(2) 7336(1) 32(1)

C2 2834(3) 6697(2) 7961(1) 33(1)

C3 1324(3) 6429(2) 8352(1) 33(1)

C4 292(3) 5785(2) 7946(1) 33(1)

C5 1179(3) 5658(2) 7309(1) 31(1)

C6 627(3) 5044(2) 6748(1) 32(1)

N7 1555(3) 4939(1) 6183(1) 31(1)

N8 778(3) 4260(2) 5718(1) 32(1)

C9 1758(3) 4114(2) 5176(1) 31(1)

C10 1295(3) 3408(2) 4644(1) 29(1)

N11 2373(3) 3324(2) 4073(1) 33(1)

C12 1766(3) 2584(2) 3651(1) 35(1)

C13 248(3) 2165(2) 3969(1) 34(1)

C14 -45(3) 2675(2) 4589(1) 29(1)

C15 2550(4) 2310(2) 3002(1) 42(1)

N16 4024(3) 2713(2) 2747(1) 38(1)

N17 4368(3) 2294(2) 2101(1) 50(1)

C18 5806(4) 2620(2) 1815(2) 43(1)

O19 977(2) 6786(1) 9010(1) 43(1)

C20 1788(4) 6211(2) 9556(1) 55(1)

O21 -1261(2) 5289(2) 8082(1) 51(1)

C22 -2304(4) 5587(3) 8659(2) 56(1)

O23 -1310(2) 2425(1) 5078(1) 34(1)

C24 -2750(3) 3132(2) 5150(1) 42(1)

O25 -615(2) 1351(1) 3713(1) 49(1)

C26 -2509(4) 1423(2) 3677(2) 67(1)

O1A 5151(3) 5197(1) 6198(1) 41(1)

C2A 5585(4) 4460(2) 6710(2) 49(1)

________________________________________________________________________________

Table 3. Bond lengths [Å] and angles [°] for **1a**.

_____________________________________________________

N1-C2 1.363(3)

N1-C5 1.372(3)

N1-H1 0.80(3)

C2-C3 1.400(3)

C2-C18#1 1.433(3)

C3-O19 1.374(3)

C3-C4 1.395(3)

C4-O21 1.360(3)

C4-C5 1.401(3)

C5-C6 1.417(3)

C6-N7 1.293(3)

C6-H6 0.96

N7-N8 1.402(3)

N8-C9 1.286(3)

C9-C10 1.436(3)

C9-H9 0.96

C10-N11 1.364(3)

C10-C14 1.406(3)

N11-C12 1.360(3)

N11-H11 0.91(3)

C12-C13 1.403(3)

C12-C15 1.425(3)

C13-O25 1.361(3)

C13-C14 1.391(3)

C14-O23 1.372(3)

C15-N16 1.318(3)

C15-H15 0.96

N16-N17 1.386(3)

N17-C18 1.281(3)

C18-C2#1 1.433(3)

C18-H18 0.96

O19-C20 1.434(3)

C20-H20A 0.96

C20-H20B 0.96

C20-H20C 0.96

O21-C22 1.410(3)

C22-H22A 0.96

C22-H22B 0.96

C22-H22C 0.96

O23-C24 1.441(3)

C24-H24A 0.96

C24-H24B 0.96

C24-H24C 0.96

O25-C26 1.414(4)

C26-H26C 0.96

C26-H26A 0.96

C26-H26B 0.96

O1A-C2A 1.433(3)

O1A-H1A 0.86(3)

C2A-H2AC 0.96

C2A-H2AA 0.96

C2A-H2AB 0.96

C2-N1-C5 110.1(2)

C2-N1-H1 127(2)

C5-N1-H1 123(2)

N1-C2-C3 107.5(2)

N1-C2-C18#1 127.6(2)

C3-C2-C18#1 124.9(2)

O19-C3-C4 128.7(2)

O19-C3-C2 123.7(2)

C4-C3-C2 107.6(2)

O21-C4-C3 131.7(2)

O21-C4-C5 120.6(2)

C3-C4-C5 107.6(2)

N1-C5-C4 107.2(2)

N1-C5-C6 126.2(2)

C4-C5-C6 126.6(2)

N7-C6-C5 123.0(2)

N7-C6-H6 118.5

C5-C6-H6 118.5

C6-N7-N8 112.57(19)

C9-N8-N7 112.39(19)

N8-C9-C10 122.7(2)

N8-C9-H9 118.5

C10-C9-H9 118.8

N11-C10-C14 107.5(2)

N11-C10-C9 118.9(2)

C14-C10-C9 133.4(2)

C12-N11-C10 110.0(2)

C12-N11-H11 126.3(17)

C10-N11-H11 123.3(17)

N11-C12-C13 107.7(2)

N11-C12-C15 124.9(2)

C13-C12-C15 127.4(2)

O25-C13-C14 129.1(2)

O25-C13-C12 123.1(2)

C14-C13-C12 107.5(2)

O23-C14-C13 124.9(2)

O23-C14-C10 127.5(2)

C13-C14-C10 107.3(2)

N16-C15-C12 124.1(2)

N16-C15-H15 117.8

C12-C15-H15 118.1

C15-N16-N17 108.7(2)

C18-N17-N16 113.5(2)

N17-C18-C2#1 133.0(3)

N17-C18-H18 113.5

C2#1-C18-H18 113.6

C3-O19-C20 113.7(2)

O19-C20-H20A 109.6

O19-C20-H20B 110.0

H20A-C20-H20B 109.5

O19-C20-H20C 108.8

H20A-C20-H20C 109.5

H20B-C20-H20C 109.5

C4-O21-C22 118.7(2)

O21-C22-H22A 109.2

O21-C22-H22B 109.4

H22A-C22-H22B 109.5

O21-C22-H22C 109.8

H22A-C22-H22C 109.5

H22B-C22-H22C 109.5

C14-O23-C24 114.49(17)

O23-C24-H24A 109.6

O23-C24-H24B 109.4

H24A-C24-H24B 109.5

O23-C24-H24C 109.4

H24A-C24-H24C 109.5

H24B-C24-H24C 109.5

C13-O25-C26 115.7(2)

O25-C26-H26C 112.1

O25-C26-H26A 107.0

H26C-C26-H26A 111.8

O25-C26-H26B 107.0

H26C-C26-H26B 111.8

H26A-C26-H26B 106.8

C2A-O1A-H1A 108(2)

O1A-C2A-H2AC 108.4

O1A-C2A-H2AA 111.3

H2AC-C2A-H2AA 108.4

O1A-C2A-H2AB 111.2

H2AC-C2A-H2AB 108.4

H2AA-C2A-H2AB 109.1

_____________________________________________________________

Symmetry transformations used to generate equivalent atoms: #1 -x+1,-y+1,-z+1

Table 4. Anisotropic displacement parameters (Å2x 103) for **1a**. The anisotropic

displacement factor exponent takes the form: -22[ h2 a*2U11 + ... + 2 h k a* b* U12 ]

______________________________________________________________________________

U11 U22 U33 U23 U13 U12

______________________________________________________________________________

N1 31(1) 32(1) 32(1) -2(1) 7(1) -1(1)

C2 34(1) 29(1) 37(1) -5(1) 4(1) 1(1)

C3 35(1) 28(1) 36(1) -4(1) 5(1) 3(1)

C4 30(1) 32(1) 39(1) 1(1) 4(1) 0(1)

C5 29(1) 29(1) 35(1) 2(1) -1(1) 0(1)

C6 29(1) 33(1) 33(1) 3(1) -3(1) -1(1)

N7 33(1) 30(1) 31(1) -1(1) -8(1) -2(1)

N8 35(1) 35(1) 27(1) 2(1) -5(1) -4(1)

C9 31(1) 28(1) 33(1) 6(1) -8(1) -2(1)

C10 27(1) 32(1) 27(1) 4(1) -2(1) 0(1)

N11 29(1) 36(1) 33(1) 2(1) 1(1) -4(1)

C12 32(1) 40(1) 34(1) -1(1) 5(1) 0(1)

C13 35(1) 33(1) 34(1) -3(1) 1(1) -3(1)

C14 29(1) 30(1) 28(1) 4(1) 2(1) 0(1)

C15 43(2) 43(2) 40(1) -9(1) 5(1) -5(1)

N16 38(1) 38(1) 38(1) -12(1) 1(1) -6(1)

N17 52(1) 55(2) 42(1) -18(1) 10(1) -12(1)

C18 43(2) 43(2) 44(2) -9(1) 8(1) -9(1)

O19 48(1) 44(1) 37(1) -11(1) 12(1) 0(1)

C20 63(2) 66(2) 36(2) -7(1) -2(1) -9(2)

O21 40(1) 55(1) 59(1) -14(1) 17(1) -17(1)

C22 36(2) 80(2) 53(2) -5(2) 16(1) -9(2)

O23 37(1) 34(1) 31(1) 5(1) 9(1) -4(1)

C24 36(1) 43(2) 46(2) 1(1) 12(1) -4(1)

O25 48(1) 43(1) 55(1) -18(1) 4(1) -12(1)

C26 60(2) 48(2) 91(3) -7(2) -26(2) -17(2)

O1A 33(1) 49(1) 40(1) 3(1) -1(1) -12(1)

C2A 39(2) 56(2) 50(2) 7(1) -3(1) 7(1)

______________________________________________________________________________

Table 5. Hydrogen coordinates ( x 104) and isotropic displacement parameters (Å2x 10 3)

for **1a**.

________________________________________________________________________________

x y z U(eq)

________________________________________________________________________________

H6 -491 4692 6787 38

H9 2842 4494 5126 37

H15 1965 1805 2731 51

H18 6009 2357 1356 52

H20A 1491 6495 10000 82

H20B 1362 5539 9536 82

H20C 3068 6219 9495 82

H22A -3354 5175 8687 85

H22B -1607 5517 9078 85

H22C -2660 6268 8604 85

H24A -3574 2908 5500 63

H24B -2264 3765 5283 63

H24C -3370 3196 4712 63

H26C -2930 2072 3801 100

H26A -2985 919 3979 100

H26B -2853 1246 3210 100

H2AC 4752 4521 7090 73

H2AA 6779 4552 6890 73

H2AB 5483 3803 6520 73

H11 3270(40) 3760(20) 3972(14) 44(8)

H1 3450(40) 6220(20) 7026(14) 41(8)

H1A 4000(40) 5200(20) 6143(16) 61(10)

________________________________________________________________________________

Table 6. Torsion angles [°] for **1a**.

________________________________________________________________

C5-N1-C2-C3 0.5(3)

C5-N1-C2-C18#1 -177.5(2)

N1-C2-C3-O19 -178.9(2)

C18#1-C2-C3-O19 -0.8(4)

N1-C2-C3-C4 -0.5(3)

C18#1-C2-C3-C4 177.6(2)

O19-C3-C4-O21 -3.9(4)

C2-C3-C4-O21 177.8(3)

O19-C3-C4-C5 178.6(2)

C2-C3-C4-C5 0.2(3)

C2-N1-C5-C4 -0.4(3)

C2-N1-C5-C6 -178.6(2)

O21-C4-C5-N1 -177.8(2)

C3-C4-C5-N1 0.1(3)

O21-C4-C5-C6 0.4(4)

C3-C4-C5-C6 178.3(2)

N1-C5-C6-N7 0.4(4)

C4-C5-C6-N7 -177.5(2)

C5-C6-N7-N8 177.3(2)

C6-N7-N8-C9 -176.2(2)

N7-N8-C9-C10 176.33(19)

N8-C9-C10-N11 177.6(2)

N8-C9-C10-C14 -8.0(4)

C14-C10-N11-C12 1.0(3)

C9-C10-N11-C12 176.8(2)

C10-N11-C12-C13 -0.9(3)

C10-N11-C12-C15 178.5(2)

N11-C12-C13-O25 -174.7(2)

C15-C12-C13-O25 5.9(4)

N11-C12-C13-C14 0.4(3)

C15-C12-C13-C14 -179.0(2)

O25-C13-C14-O23 0.8(4)

C12-C13-C14-O23 -173.9(2)

O25-C13-C14-C10 175.0(2)

C12-C13-C14-C10 0.3(3)

N11-C10-C14-O23 173.2(2)

C9-C10-C14-O23 -1.7(4)

N11-C10-C14-C13 -0.8(3)

C9-C10-C14-C13 -175.6(2)

N11-C12-C15-N16 3.6(4)

C13-C12-C15-N16 -177.2(3)

C12-C15-N16-N17 -178.2(3)

C15-N16-N17-C18 -178.4(3)

N16-N17-C18-C2#1 2.7(5)

C4-C3-O19-C20 94.1(3)

C2-C3-O19-C20 -87.8(3)

C3-C4-O21-C22 15.8(4)

C5-C4-O21-C22 -166.9(2)

C13-C14-O23-C24 -112.9(3)

C10-C14-O23-C24 74.2(3)

C14-C13-O25-C26 52.8(4)

C12-C13-O25-C26 -133.3(3)

________________________________________________________________

Symmetry transformations used to generate equivalent atoms:

#1 -x+1,-y+1,-z+1

Figure 1. View of **1a** showing the atom labeling scheme. Displacement ellipsoids are scaled to the 50% probability level. Some of the hydrogen atoms have been removed for clarity. The macrocycle lies around a crystallographic inversion center at ½, ½, ½. Atoms with labels appended by ‘ are related by 1-x, 1-y, 1-z. Dashed lines are indicative of H-bonding interactions with geometry: N11-H11…O1a’, N…O 2.763(3)Å, H…O 1.86(3)Å, N-H…O 171(3)°; O1a-H1a…N7, O…N 2.698(3)Å, H…N 1.86(3)Å, O-H…N 166(3)°.

Figure 2. Unit cell packing diagram for a**1**. The view is approximately down the **a** axis.
